# Supplementary material
Source: PubMed Central journal article supplement (PMC3336944)

## SUPPLEMENTARY DATA

FIG. S1. Transverse sections of a variegated leaf of *B. chlorosticta* from (A) a green and (B) a light area, showing intermittent intercellular space (arrows) in the light area. Scale bars = 50  $\mu\text{m}$ .

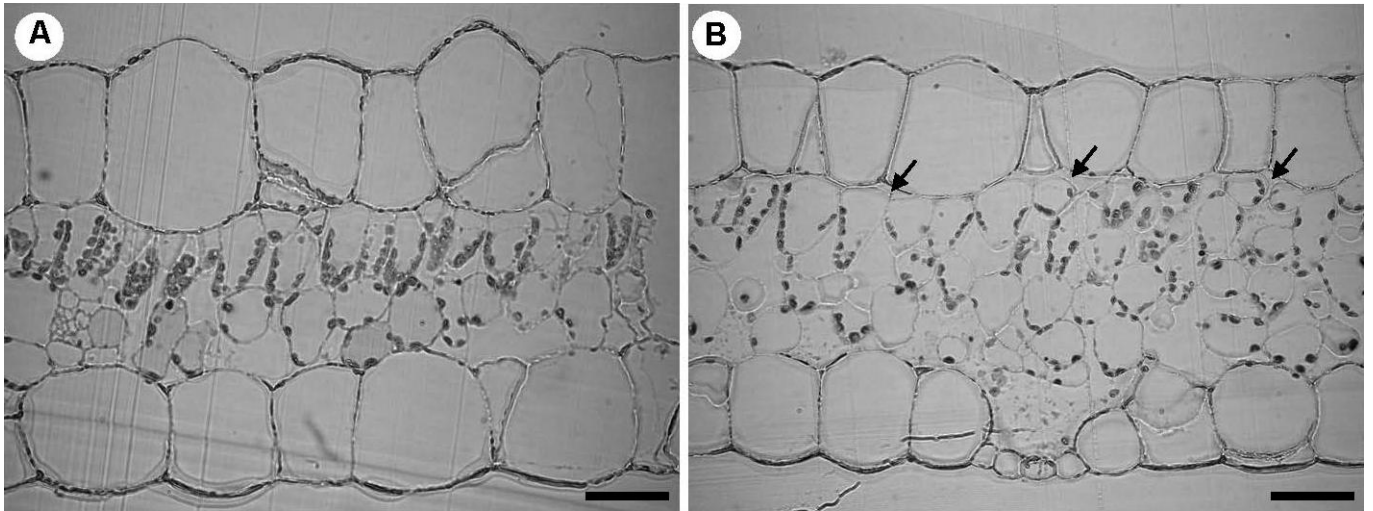

FIG. S2. Individuals of *Begonia versicolor* with three variegation patterns growing together in close proximity at Daweishan in Yunan, China.

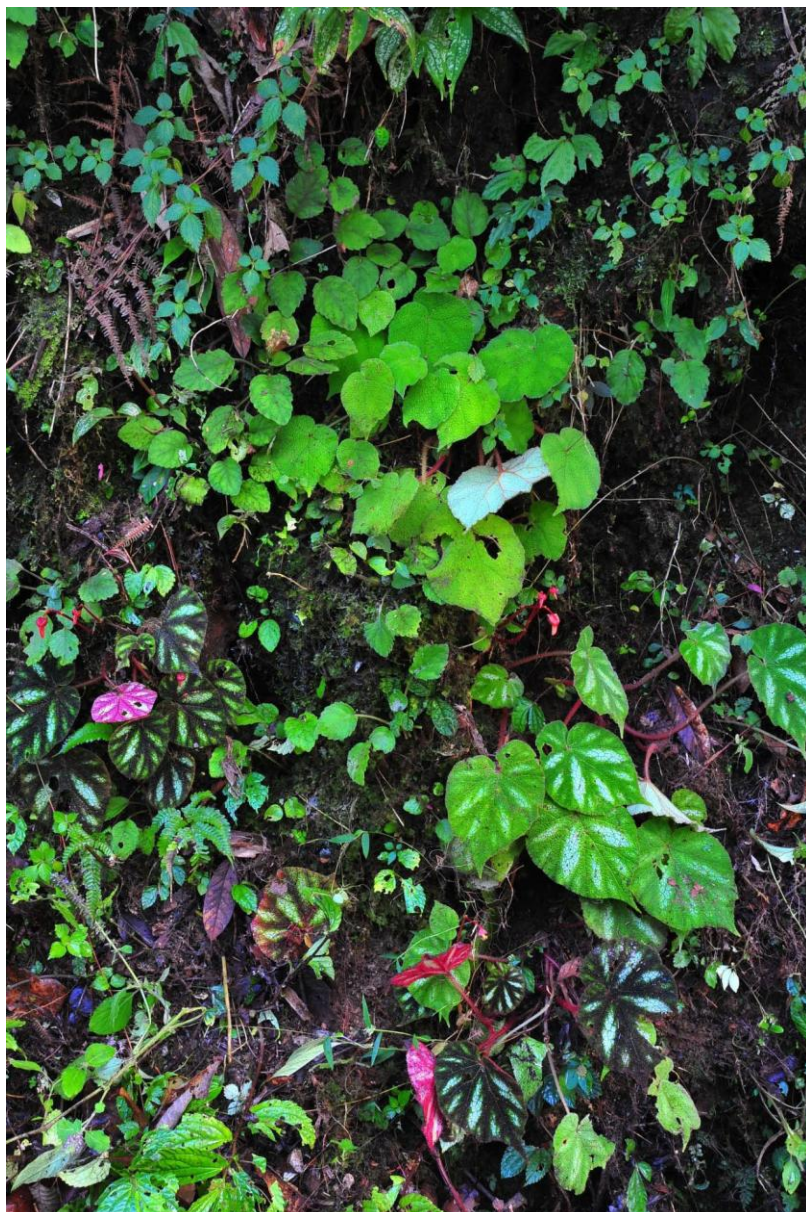

Supplement: supp_mcs025_mcs025supp.pdf [file supp_mcs025_mcs025supp.pdf]
